# Supplementary material
Source: Research Square preprint supplement (doi:10.21203/rs.3.rs-10156447/v1)
Supplement: Supplementary file 1 [file ff10221c4e6c9aadf68708a5.docx]

**Assembly of Foldameric Copolymers into Ordered Nanostructures and Crystalline Networks**

Hyeonmin Jeong1, Thi Vo1*

1 Chemical and Biomolecular Engineering, Johns Hopkins University, Baltimore, MD 21218

* Corresponding Author: [tvo12@jhu.edu](mailto:tvo12@jhu.edu)

**Contents**

**Appendix A: Coarse-Grained Simulation Model for Foldameric Block Copolymer Assembly**

**Appendix B: Shape-Particle Simulation Model for Large-Scale Porous Network Formation**

**Appendix C: Characterization and Analysis**

**Appendix D: Melting Curves of Coarse-Grained Patchy Polygon**

**Appendix A: Coarse-Grained Simulation Model for Foldameric Block Copolymer Assembly**

**A.1 Model Design and Motivation**

The coarse-grained (CG) model is designed to capture the essential physics of a linear block copolymer architecture consisting of alternating foldameric () and flexible () domains, following the motif described in the main text. The key physical requirement of this design is that the rigid, helical foldameric blocks act as steric spacers to prevent the hydrophobic flexible blocks from globally collapsing into an amorphous SNP-like globule, thereby directing chain folding into porous polygonal nanostructures. To encode these features, the model distinguishes between two chemically distinct block types. The foldameric block () is represented by rigid monomers capable of forming a stable -helix, whose length scales linearly with the number of monomers (), consistent with a rigid-rod behavior. The flexible block () is represented by monomers whose size scales as upon hydrophobic collapse, mimicking the classical behavior of collapsed chains in a poor solvent. The interplay between and — specifically the condition , or equivalently — defines the boundary between well-folded polygonal nanostructures and misfolded morphologies, as established in the main text. Molecular dynamics simulations are performed using HOOMD-Blue v4.9.1

**A.2 Particle Types and Interactions**

The polymer chain is represented by monomers of two functional classes corresponding to the foldameric () and flexible () block types. Helix monomers, representing the foldameric block, are treated as part of rigid bodies to enforce the structural rigidity intrinsic to the folded helical domain; directional patch interactions between these monomers encode the specific geometry of helix–helix stacking, the key interaction driving the formation of straight, rigid edges in the folded nanostructure. Flexible monomers, representing the flexible block, interact isotropically and are designed to collapse upon activation of hydrophobic-like attraction, forming the compact vertex regions of the folded polygonal chain; the size of the collapsed flexible domain sets the vertex patch size used in the coarse-grained polygon model described in the main text. Additionally, long-range repulsive interactions between helix monomers prevent parallel edge alignment, promoting the formation of open, porous polygonal nanostructures rather than close-packed, globular morphologies, consistent with the design rationale outlined in the main text.

**A.3 Interaction Potentials**

**Lennard-Jones (LJ) Potential**

Steric interactions between all monomer pairs are described by the Lennard-Jones (LJ) potential,

where is the center-to-center distance, is the interaction strength, and is the effective monomer diameter. For purely repulsive pairs, the cutoff is set at the WCA limit with . Selective attractive LJ interactions are activated between specific pairs during the simulation protocol to drive either helical–flexible block interfacial repulsion () or flexible–flexible monomer hydrophobic collapse, where the flexible monomer attraction strength is initially set to to complete the collapse of flexible blocks into the vertices and is subsequently increased to during the network formation stage.

**Anisotropic Patchy LJ Potential**

Directional helix–helix stacking interactions are modeled using an anisotropic patchy Lennard-Jones (PatchyLJ) potential, wherein the standard LJ potential is modulated by an orientation-dependent envelope function. The full pair potential between particles  and  takes the form,

where  is the isotropic Lennard-Jones pair potential with the attraction strength of patch and  is the normalized sigmoid envelope function defined as

with normalization bounds

Here,  is the angle between the -th patch director of particle  (rotated into the lab frame by its orientation quaternion ) and the interparticle unit vector . The parameter  is the patch half-opening angle and  controls the steepness of the patch boundary. In the limit  (, i.e., well within the patch), the potential reduces to the bare LJ interaction; when , the envelope decays rapidly to zero, suppressing interaction outside the patch cone. In the present model, each helix patch monomer carries a single director aligned along the helix axis, with  and , such that two helix monomers interact attractively only when both directors are mutually pointed toward each other along the helix propagation axis, enforcing the end-to-end stacking geometry. The attractive strength is , activated during the folding stage.

**Yukawa Potential**

Long-range repulsive interactions between helix monomers are modeled using the Yukawa potential2,

where is the interaction strength, is the inverse screening length, and is the center-to-center distance. Here and (unscreened), with a cutoff of . This long-range repulsion between helix monomers prevents parallel alignment of adjacent helical edges, which is the physical mechanism by which the model suppresses globular collapse and instead promotes the formation of open, porous polygonal geometries — analogous to the role of the steric repulsion between rigid foldameric edges described in the main text.

**FENE-WCA Bond Potential**

Covalent connectivity along the chain backbone is described by the finitely extensible nonlinear elastic (FENE) bond potential combined with a WCA repulsive term,

where is the spring constant and is the maximum extensibility. The FENE potential connects both helix and flexible monomers along the chain contour, providing the bonded connectivity that constitutes the polymer sequence. The maximum extensibility is logarithmically ramped from down to (helical block) and (flexible block), allowing the chain to gradually adopt its equilibrium bonded geometry without steric overlaps during initialization.

**Gravitational Deposition Potential**

To model substrate-directed deposition of the folded polygonal nanostructures, an external-field term was introduced in the form of a weak constant body force together with an attractive planar wall potential. The gravity-like driving force was implemented using a constant force acting along the negative -direction, such that the flexible segments experience a force , where . This external bias promotes gradual settling of the folded structures toward the substrate while avoiding abrupt distortion of the pre-formed polygonal conformations.

The substrate was represented by a planar Lennard-Jones wall positioned near the lower -boundary of the simulation box. All backbone and patch particles experienced short-range steric repulsion from the wall with , while attractive wall interactions were additionally assigned to the flexible monomers with  in the initial setup and increased to  during the gravity-assisted deposition stage. The combination of weak directional forcing and selective wall attraction enables quasi-two-dimensional deposition of folded nanostructures onto the surface, providing an initialized configuration suitable for subsequent lateral compression and network ordering.

**A.4 Simulation Protocol**

The simulation proceeds through sequential stages designed to first form the folded helical structure, then deposit the folded nanostructures onto a substrate, and subsequently drive inter-chain network assembly under lateral confinement. The chain backbone is first compacted during a FENE ramp stage, wherein the maximum extensibility  is reduced logarithmically over 750 steps  200 MD timesteps to establish the equilibrium bonded geometry without steric overlaps. The system is then equilibrated for  steps at constant temperature, allowing residual stress from the ramp to relax.

A subsequent temperature-cycling stage applies a cyclic schedule with  oscillating between  and , with hold and ramp times of  steps each, to assist the helix monomers in sampling favorable orientational configurations prior to structure formation. During this stage, directional PatchyLJ attraction between helix patch monomers is activated with , while temporary long-range repulsive Yukawa interactions are introduced between helix-associated and flexer-associated species to suppress premature collapse and promote formation of well-defined polygonal conformations. The system is evolved for  steps under this cycling protocol, allowing helix-helix stacking contacts to develop and trigger chain cyclization into closed polygonal nanostructures.

Following folding, a gravity-assisted deposition stage is applied to transfer the folded structures toward the planar substrate. In this step, the constant external force  with  is applied to flexible monomers, and the attractive wall interaction acting on the flexible block is strengthened to , and the system is evolved for  steps to allow gradual surface deposition and relaxation of the folded polygons into a surface-associated configuration.

After deposition, the system is subjected to a quasi-static compression stage to increase lateral packing and promote crystalline network ordering. The box dimensions in the  and  directions are reduced using a BoxResize protocol, while the -dimension is retained to preserve the substrate-normal direction established during deposition. Specifically, the target area is defined from  with , and the corresponding lateral box lengths are set to . The box is then compressed over  steps using a linear ramp, allowing the deposited polygons to reorganize into a more compact porous arrangement without abrupt mechanical disruption. In the final assembly stage, flexible block-mediated isotropic attractions are maintained, and the system is evolved for up to  steps to drive inter-chain association between pre-formed vertices and produce an extended porous crystalline network. All simulations are performed in the NVT ensemble using the Nosé--Hoover MTTK thermostat with thermostat relaxation time  and timestep , and configurations are saved every  timesteps in GSD format.

**Appendix B: Shape-Particle Simulation Model for Large-Scale Porous Network Formation**

**B.1 Model Design and Motivation**

The shape‑particle model represents each folded nanostructure as a single rigid polygonal particle equipped with localized interaction sites. The polygonal “core” captures the overall cross‑sectional shape and size of the folded chain, while two classes of patches are attached: vertex patches located near the polygon vertices and edge patches positioned along the polygon edges. The polygonal area of each core is used to set the moment of inertia, ensuring that the rotational dynamics are consistent with the particle’s geometric size.

This construction coarse‑grains away all internal monomeric detail and treats each folded object as a rigid polygon decorated with isotropic interaction sites. The goal is to efficiently probe how such shape‑particles assemble into extended networks at larger length scales, focusing on how vertex‑mediated attraction and edge‑mediated exclusion encode connectivity and porosity in the resulting structures.

An initial configuration is prepared by placing a single shape particle at the origin and replicating it on a regular two‑dimensional lattice within a square simulation domain. The system thickness in the out‑of‑plane direction is taken to be negligible, so that the dynamics are effectively two‑dimensional. A replication factor of  (with ) produces  identical polygons, and the total polygonal area is . A target area fraction  defines the final packing density of the assembly.

**B.2 Interaction Potentials**

**Vertex–vertex Lennard–Jones attraction**

Vertex–vertex attraction between vertex patches is modeled by an isotropic Lennard–Jones pair potential acting only on the centers of the vertex patches. The interaction between two vertex patches at separation  is given by

where  is the well depth in reduced units and  sets the characteristic length scale associated with the vertex patch diameter. The potential is truncated and shifted at a finite cutoff  (of order a few ) so that attractive vertex–vertex contacts form when two vertex patches approach within a distance comparable to .

**Edge–edge Yukawa repulsion**

Edge–edge repulsion between edge patches is described by an isotropic Yukawa potential. The interaction between two edge patches at separation  takes the form

with  and  (unscreened limit).This repulsive interaction is applied only between edge patches and is truncated at a cutoff , where  is the effective diameter of the edge patch. The resulting long‑ranged, purely repulsive edge–edge interaction penalizes close approach of edge patches and suppresses tightly edge‑aligned aggregates.

**B.3 Simulation Protocol**

Initially, only steric repulsion acts and the system is equilibrated at low density, after which the box area is reduced quasi‑statically until the polygons occupy a fraction  of the box, yielding a dense, unbonded packing. Short‑ranged isotropic Lennard‑Jones attractions between vertex patches are then activated to promote vertex–vertex binding, while isotropic Yukawa‑type repulsions between edge patches penalize edge–edge approach, biasing connectivity toward open, vertex‑connected networks. A subsequent temperature‑cycling protocol between low and high reduced temperatures repeatedly breaks and reforms patch‑mediated contacts, allowing the system to explore network‑scale rearrangements; over many cycles, this drives the formation of mechanically stable polygonal networks whose connectivity and porosity can be analyzed at a larger emergent length scale than in the underlying monomer‑level model.

**Appendix C: Characterization and Analysis**

**C.1 Length of Folded Helical Block**

The end-to-end distance of each helical block was quantified as the magnitude of the displacement vector between its first and last backbone monomers. For a helical block comprising monomers with indices  and positions , the end-to-end distance  is defined as

When multiple helical blocks are present in a configuration, the block-averaged end-to-end length is computed as

where  denotes the end-to-end distance of the -th helical block and  is the total number of helical blocks in the system.

**C.2 Radius of Gyration of Flexible Block**

The conformational size of each flexible block was characterized by its radius of gyration , defined with respect to the block’s center of mass. For a flexible block comprising  monomers with positions , the instantaneous center-of-mass position  is first computed as

The radius of gyration of that block is then given by

which measures the root-mean-square distance of the flexible monomers from their center of mass. When multiple flexible blocks are present, the block-averaged radius of gyration is obtained by averaging  over all flexible blocks and over sampled configurations.

**C.3 Vertex-to-Vertex Distance (Polygon Edge Length)**

The distance between two vertices was defined as the magnitude of the displacement vector between the centers of mass of the corresponding flexible blocks, , where  denotes the center-of-mass position of the -th flexible (vertex) block.

**C.4 Polygon Area**

The polygonal area was calculated from the center-of-mass positions of the flexible vertex blocks projected onto the substrate plane. Assuming that the folded polygon lies approximately parallel to the substrate, the in-plane coordinates of the -th vertex were taken as , where  is the center-of-mass position of the corresponding flexible block. The area of the -sided polygon was then obtained using the shoelace formula,

with .

**C.5 Polygon Internal Angle**

The internal angle at each polygon vertex was computed directly from the centers of mass of three consecutive flexible blocks in three dimensions. For the -th vertex, the centers of mass of the preceding, current, and following vertices were denoted by , , and , respectively, where . The two edge vectors incident on vertex  were defined as

The internal angle  at vertex  was then obtained from the standard three-dimensional dot-product relation,

which corresponds to the angle between the two 3D edge vectors defined by the three vertex centers. The resulting set  characterizes the internal polygon angles encoded by the flexible vertex blocks of the folded nanostructure.

**Appendix D: Melting Curves of Coarse-Grained Patchy Polygon**

**
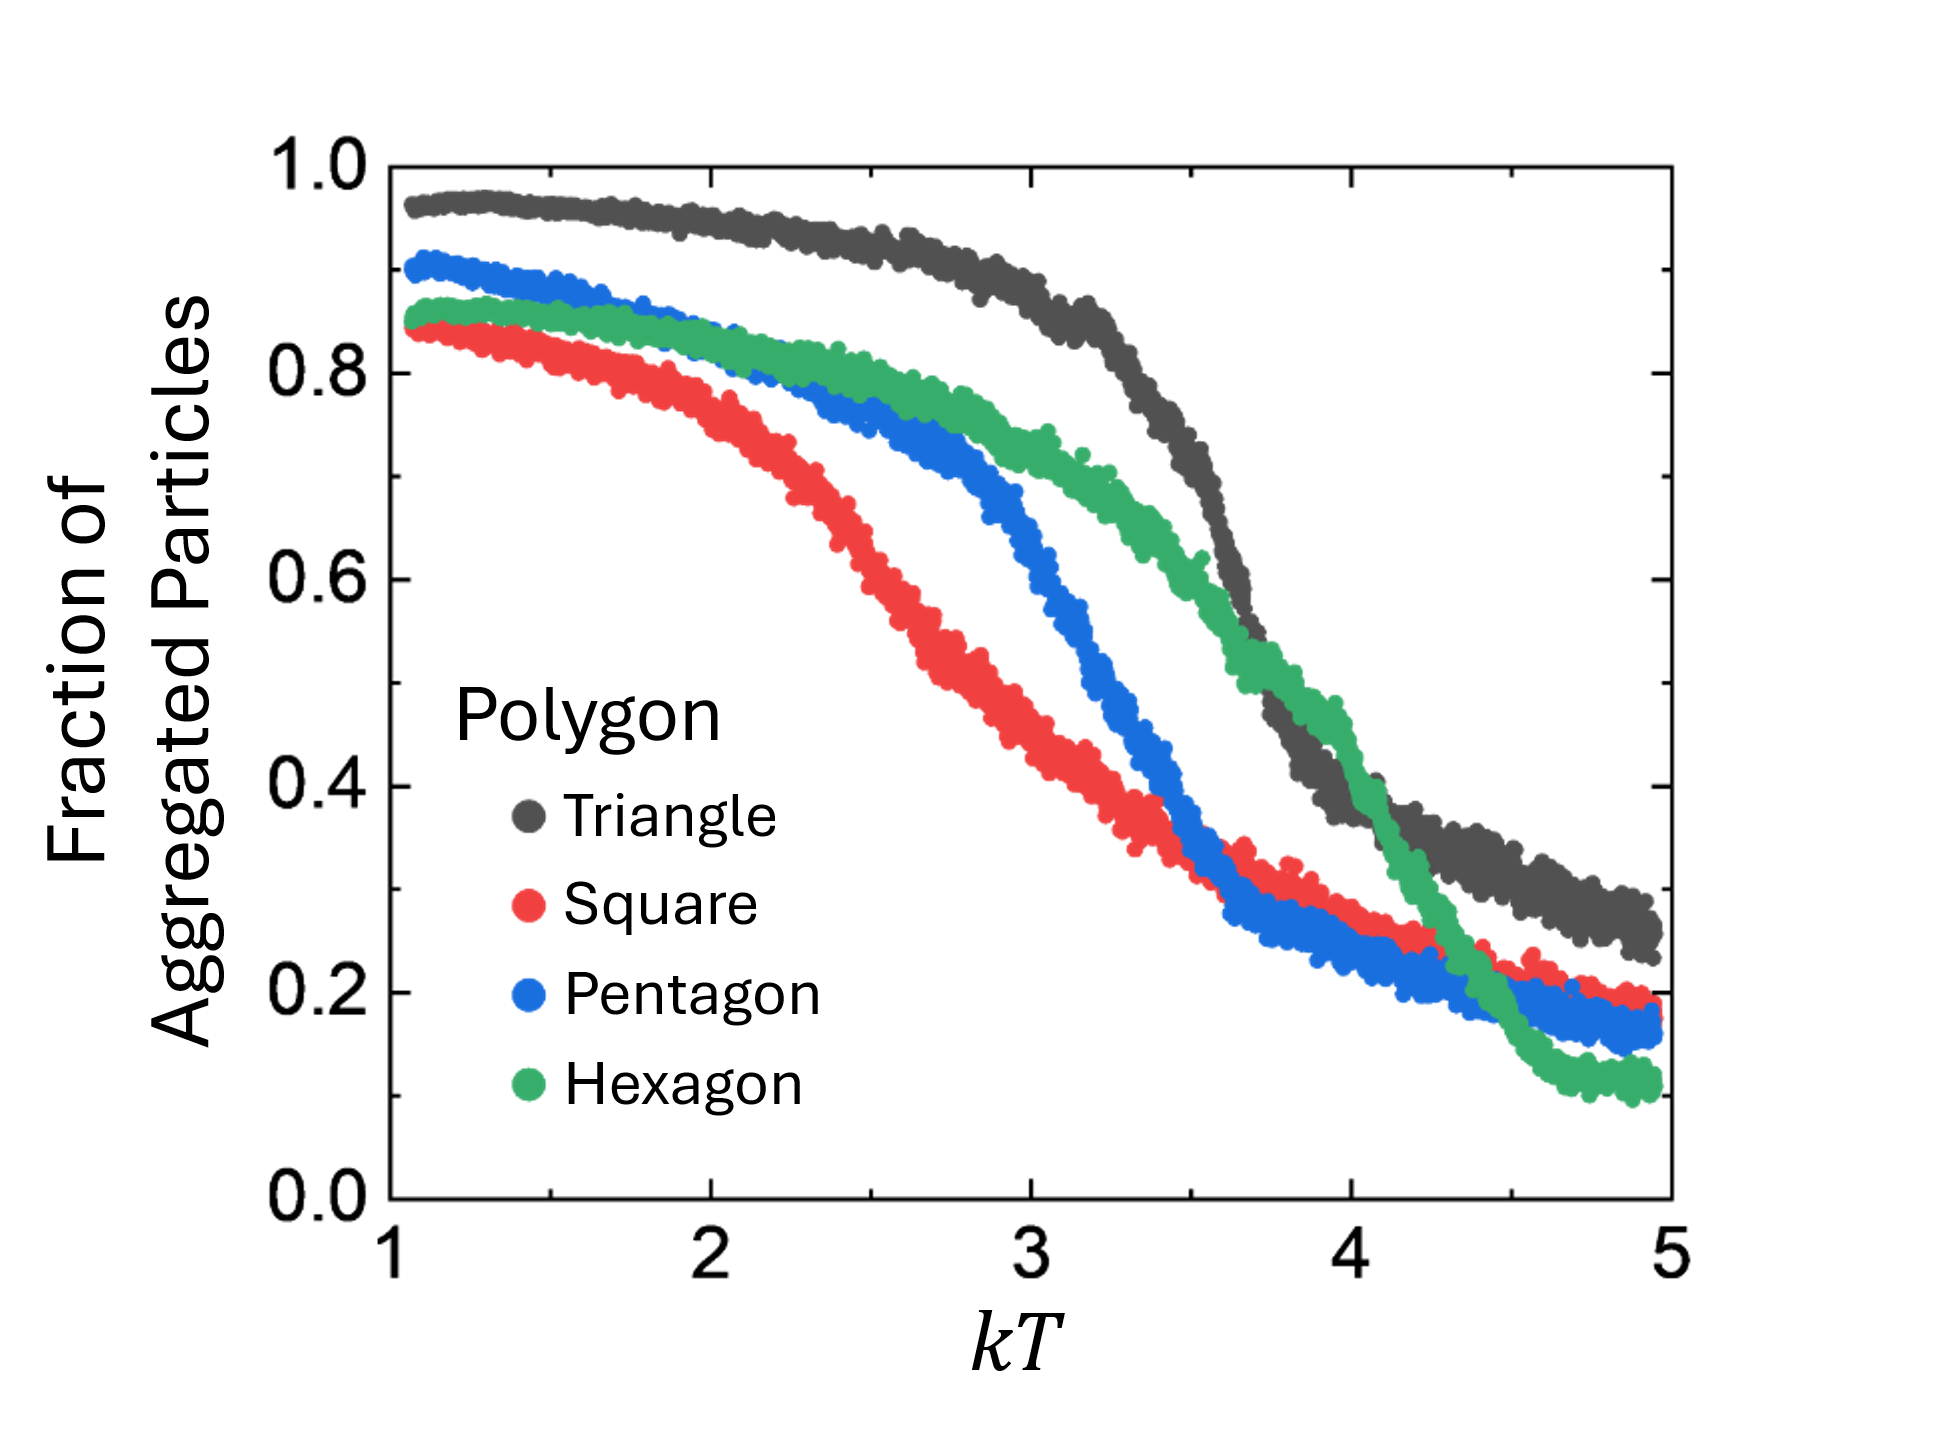
**

**Figure D1. Melting Curve of CG Patchy Polygons.** Fraction of aggregate particles counts how many CG particles are connected into a network, normalized by the total particle counts. represents the system temperature. As increase, the crystal falls apart and the number of particles in a cluster decreases. We define the melting as the 50% mark of each curve.

**References**

1. J. A. Anderson, J. Glaser and S. C. Glotzer, *Comput. Mater. Sci.*, 2020, **173**, 109363.
2. H. Yukawa, *Proc. Phys.-Math. Soc. Jpn. 3rd Ser.*, 1935, **17**, 48–57.
